# Supplementary material for: Facial shape and allometry quantitative trait locus intervals in the Diversity Outbred mouse are enriched for known skeletal and facial development genes
Source: PubMed Central journal article supplement (PMC7274373; doi:10.1371/journal.pone.0233377), 2020-06-05
Supplement: pone.0233377.s003.pdf [file pone.0233377.s003.pdf]

| <u>PC</u> | <u>Chr.</u> | <u>Position<br/>cM</u> | <u>LOD<br/>threshold</u> | <u>LOD</u> | <u>Position<br/>Mbp</u> | <u>CI<br/>Mbp Low</u> | <u>CI<br/>Mbp High</u> | <u>CI<br/>Widths</u> |
|-----------|-------------|------------------------|--------------------------|------------|-------------------------|-----------------------|------------------------|----------------------|
| PC1       | 1           | 26.650                 | 7.4316                   | 7.47       | 51.92662                | 51.84963              | 53.29940               | 1.44978              |
| PC1       | 6           | 46.261                 | 7.4316                   | 10.43      | 99.63722                | 98.87835              | 100.25880              | 1.38045              |
| PC1       | 7           | 35.436                 | 7.4316                   | 11.59      | 65.97085                | 56.39222              | 66.70274               | 10.31051             |
| PC2       | 6           | 2.227                  | 7.4068                   | 8.64       | 5.70473                 | 3.37161               | 6.03770                | 2.66609              |
| PC2       | 14          | 12.035                 | 7.4068                   | 7.57       | 22.05840                | 21.51874              | 31.93686               | 10.41812             |
| PC3       | 12          | 3.887                  | 7.4826                   | 12.93      | 8.44203                 | 8.23271               | 9.83742                | 1.60471              |
| PC3       | 12          | 7.752                  | 7.4826                   | 7.55       | 16.28680                | 15.57275              | 17.40083               | 1.82808              |
| PC4       | 17          | 22.576                 | 7.3454                   | 8.33       | 45.63977                | 44.73754              | 48.21456               | 3.47702              |
| PC6       | 7           | 77.768                 | 7.5869                   | 8.54       | 133.96430               | 133.15529             | 134.45830              | 1.30301              |
| PC7       | 3           | 19.668                 | 7.3528                   | 8.39       | 41.09667                | 39.97819              | 46.49435               | 6.51615              |
| PC7       | 17          | 9.119                  | 7.3528                   | 7.53       | 15.19797                | 12.69950              | 28.17045               | 15.47096             |
| PC7       | 18          | 29.197                 | 7.3528                   | 7.80       | 54.45076                | 39.71517              | 54.57177               | 14.85659             |
| PC9       | 8           | 33.131                 | 7.4073                   | 7.75       | 66.36843                | 61.78359              | 67.14575               | 5.36216              |
| PC9       | 8           | 33.547                 | 7.4073                   | 7.90       | 68.11571                | 67.49771              | 68.73613               | 1.23842              |
| PC9       | 8           | 40.818                 | 7.4073                   | 7.76       | 84.29230                | 82.44561              | 117.36733              | 34.92172             |
| PC9       | 11          | 62.326                 | 7.4073                   | 7.92       | 98.59369                | 82.09133              | 106.60060              | 24.50927             |
| PC10      | 15          | 16.562                 | 7.4444                   | 8.45       | 42.43605                | 40.16640              | 52.33545               | 12.16905             |
| PC10      | 16          | 34.119                 | 7.4444                   | 8.00       | 56.65842                | 55.36893              | 69.57857               | 14.20965             |
| PC12      | 3           | 18.610                 | 7.2631                   | 7.71       | 38.47037                | 37.94061              | 39.68852               | 1.74791              |
| PC12      | 15          | 25.967                 | 7.2631                   | 7.27       | 61.61672                | 58.25213              | 65.30036               | 7.04823              |
| PC13      | 15          | 24.482                 | 7.3721                   | 7.56       | 58.21462                | 57.77819              | 59.19820               | 1.42001              |
| PC13      | 15          | 26.147                 | 7.3721                   | 8.24       | 61.86418                | 60.81292              | 63.76806               | 2.95514              |
| PC14      | 17          | 56.011                 | 7.4216                   | 7.50       | 85.72647                | 43.53622              | 86.18045               | 42.64424             |
| PC15      | 4           | 83.406                 | 7.3487                   | 7.64       | 152.85288               | 152.44320             | 153.63442              | 1.19122              |
| PC15      | 10          | 57.592                 | 7.3487                   | 7.75       | 110.39634               | 107.71115             | 110.44517              | 2.73402              |
| PC15      | X           | 45.660                 | 7.3487                   | 8.75       | 102.71168               | 102.14335             | 104.46776              | 2.32441              |
| PC16      | 12          | 22.220                 | 7.4643                   | 8.32       | 52.76945                | 49.79955              | 53.96553               | 4.16598              |
| PC17      | 1           | 54.938                 | 7.3876                   | 7.67       | 126.11498               | 121.31522             | 128.49124              | 7.17602              |
| PC17      | 4           | 40.835                 | 7.3876                   | 9.63       | 86.99807                | 83.20196              | 87.04323               | 3.84127              |
| PC17      | 7           | 74.072                 | 7.3876                   | 8.06       | 131.48256               | 131.28649             | 131.94025              | 0.65376              |
| PC17      | 7           | 81.000                 | 7.3876                   | 7.63       | 134.99036               | 134.40151             | 135.42103              | 1.01952              |
| PC18      | 11          | 40.422                 | 7.4163                   | 8.32       | 64.98322                | 64.22864              | 69.22887               | 5.00023              |
| PC18      | 17          | 31.958                 | 7.4163                   | 7.81       | 61.38764                | 58.42704              | 62.28231               | 3.85526              |
| PC18      | 19          | 36.670                 | 7.4163                   | 7.73       | 43.46057                | 42.68460              | 44.34706               | 1.66246              |
| PC19      | 12          | 24.388                 | 7.4248                   | 8.09       | 56.41822                | 54.53122              | 56.90621               | 2.37498              |
| PC19      | 12          | 25.938                 | 7.4248                   | 7.43       | 58.92540                | 58.59412              | 60.17437               | 1.58025              |
| PC20      | 14          | 17.199                 | 7.4380                   | 8.05       | 29.12248                | 27.61014              | 32.47411               | 4.86397              |
