# Supplementary material for: Facial shape and allometry quantitative trait locus intervals in the Diversity Outbred mouse are enriched for known skeletal and facial development genes
Source: PubMed Central journal article supplement (PMC7274373; doi:10.1371/journal.pone.0233377), 2020-06-05
Supplement: pone.0233377.s004.pdf [file pone.0233377.s004.pdf]

| Chromosome | PC1   | PC2   | PC3   | PC4   | PC5   | PC6   | PC7   | PC8   | PC9   | PC10  | PC11  | PC12  | PC13  | PC14  | PC15  | PC16  | PC17  | PC18  | PC19  | PC20  |
|------------|-------|-------|-------|-------|-------|-------|-------|-------|-------|-------|-------|-------|-------|-------|-------|-------|-------|-------|-------|-------|
| 1          | 0.528 | 0.437 | 0.555 | 0.331 | 0.433 | 0.556 | 0.475 | 0.473 | 0.540 | 0.542 | 0.230 | 0.410 | 0.540 | 0.432 | 0.488 | 0.441 | 0.464 | 0.427 | 0.453 | 0.500 |
| 2          | 0.537 | 0.445 | 0.550 | 0.350 | 0.482 | 0.570 | 0.485 | 0.449 | 0.547 | 0.542 | 0.239 | 0.429 | 0.535 | 0.426 | 0.493 | 0.450 | 0.456 | 0.468 | 0.456 | 0.517 |
| 3          | 0.545 | 0.449 | 0.523 | 0.353 | 0.455 | 0.579 | 0.460 | 0.444 | 0.544 | 0.549 | 0.243 | 0.407 | 0.527 | 0.444 | 0.472 | 0.449 | 0.486 | 0.482 | 0.442 | 0.524 |
| 4          | 0.534 | 0.449 | 0.536 | 0.368 | 0.463 | 0.553 | 0.474 | 0.459 | 0.546 | 0.537 | 0.245 | 0.428 | 0.526 | 0.432 | 0.474 | 0.442 | 0.435 | 0.461 | 0.449 | 0.487 |
| 5          | 0.545 | 0.438 | 0.526 | 0.381 | 0.468 | 0.588 | 0.477 | 0.451 | 0.547 | 0.515 | 0.252 | 0.422 | 0.525 | 0.432 | 0.490 | 0.420 | 0.460 | 0.465 | 0.453 | 0.536 |
| 6          | 0.534 | 0.429 | 0.516 | 0.353 | 0.458 | 0.572 | 0.478 | 0.463 | 0.553 | 0.514 | 0.254 | 0.439 | 0.530 | 0.428 | 0.479 | 0.448 | 0.476 | 0.473 | 0.456 | 0.498 |
| 7          | 0.514 | 0.451 | 0.562 | 0.349 | 0.481 | 0.543 | 0.463 | 0.477 | 0.545 | 0.565 | 0.230 | 0.414 | 0.551 | 0.441 | 0.483 | 0.457 | 0.444 | 0.473 | 0.460 | 0.501 |
| 8          | 0.556 | 0.439 | 0.551 | 0.350 | 0.461 | 0.577 | 0.482 | 0.453 | 0.485 | 0.546 | 0.248 | 0.413 | 0.518 | 0.432 | 0.491 | 0.435 | 0.460 | 0.482 | 0.463 | 0.493 |
| 9          | 0.528 | 0.444 | 0.539 | 0.365 | 0.467 | 0.560 | 0.493 | 0.476 | 0.539 | 0.549 | 0.232 | 0.424 | 0.529 | 0.440 | 0.477 | 0.444 | 0.468 | 0.476 | 0.452 | 0.493 |
| 10         | 0.533 | 0.413 | 0.563 | 0.348 | 0.463 | 0.561 | 0.490 | 0.453 | 0.541 | 0.538 | 0.235 | 0.428 | 0.512 | 0.450 | 0.480 | 0.444 | 0.477 | 0.488 | 0.455 | 0.504 |
| 11         | 0.539 | 0.436 | 0.527 | 0.364 | 0.451 | 0.573 | 0.476 | 0.454 | 0.500 | 0.558 | 0.233 | 0.412 | 0.510 | 0.417 | 0.488 | 0.437 | 0.471 | 0.463 | 0.458 | 0.503 |
| 12         | 0.530 | 0.420 | 0.515 | 0.352 | 0.462 | 0.558 | 0.481 | 0.449 | 0.550 | 0.532 | 0.245 | 0.425 | 0.530 | 0.430 | 0.486 | 0.429 | 0.442 | 0.465 | 0.438 | 0.497 |
| 13         | 0.548 | 0.443 | 0.543 | 0.343 | 0.450 | 0.585 | 0.455 | 0.442 | 0.560 | 0.538 | 0.239 | 0.399 | 0.520 | 0.449 | 0.476 | 0.457 | 0.459 | 0.489 | 0.453 | 0.495 |
| 14         | 0.546 | 0.422 | 0.546 | 0.349 | 0.464 | 0.577 | 0.487 | 0.467 | 0.557 | 0.529 | 0.245 | 0.439 | 0.527 | 0.440 | 0.496 | 0.459 | 0.485 | 0.467 | 0.463 | 0.475 |
| 15         | 0.555 | 0.453 | 0.536 | 0.362 | 0.462 | 0.578 | 0.485 | 0.469 | 0.541 | 0.536 | 0.234 | 0.421 | 0.528 | 0.429 | 0.488 | 0.442 | 0.463 | 0.476 | 0.448 | 0.503 |
| 16         | 0.555 | 0.443 | 0.545 | 0.362 | 0.467 | 0.568 | 0.501 | 0.470 | 0.536 | 0.549 | 0.255 | 0.445 | 0.545 | 0.439 | 0.485 | 0.444 | 0.464 | 0.478 | 0.454 | 0.509 |
| 17         | 0.547 | 0.425 | 0.536 | 0.310 | 0.460 | 0.568 | 0.472 | 0.447 | 0.551 | 0.556 | 0.258 | 0.436 | 0.531 | 0.399 | 0.484 | 0.449 | 0.471 | 0.476 | 0.451 | 0.491 |
| 18         | 0.546 | 0.443 | 0.544 | 0.349 | 0.473 | 0.587 | 0.471 | 0.464 | 0.546 | 0.552 | 0.254 | 0.426 | 0.541 | 0.458 | 0.488 | 0.461 | 0.477 | 0.478 | 0.456 | 0.516 |
| 19         | 0.546 | 0.451 | 0.563 | 0.358 | 0.472 | 0.574 | 0.470 | 0.484 | 0.550 | 0.542 | 0.249 | 0.414 | 0.549 | 0.459 | 0.495 | 0.449 | 0.475 | 0.490 | 0.439 | 0.506 |
| X          | 0.548 | 0.448 | 0.558 | 0.367 | 0.459 | 0.583 | 0.494 | 0.467 | 0.543 | 0.553 | 0.256 | 0.422 | 0.543 | 0.450 | 0.483 | 0.455 | 0.481 | 0.476 | 0.467 | 0.531 |
